# Supplementary material
Source: PubMed Central journal article supplement (PMC5903416)
Supplement: ddw430_supp.pdf [file ddw430_supp.pdf]

**A**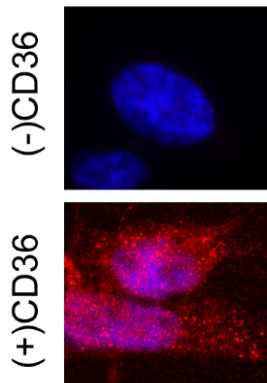**B**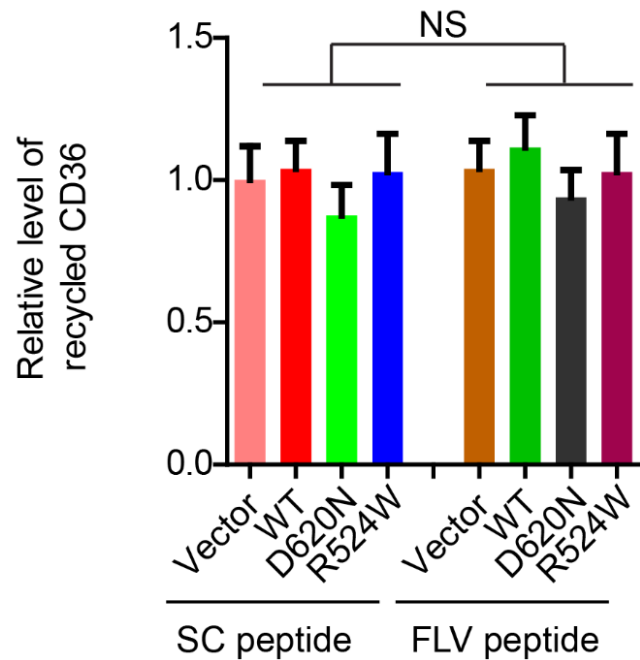

**Supplemental Figure 1. FLV peptide has no effects on CD36 recycling by VPS35 in M17 cells.** (A) Representative pictures of CD36 recycling assay in M17 cells treated with scramble peptide or FLV peptide. (B) Quantification of CD36 recycling assay in M17 cells expressing VPS35 wildtype or PD mutants treated with scrambled peptide or FLV peptide. Data are means  $\pm$  s.e.m of 3 independent experiments. Statistics: one-way analysis of variance (ANOVA) followed by Tukey's multiple comparison test. NS: non-significant.
